# Supplementary material
Source: MDPI journal article supplement (https://www.mdpi.com/2075-4701/11/11/1824)
Supplement: s1 [file s1]

# Modelling the Effect of Solution Composition and Temperature on the Conductivity of Zinc Electrowinning Electrolytes

Zulin Wang<sup>1</sup>, Arif T. Aji<sup>1</sup>, Benjamin P. Wilson<sup>1</sup>, Steinar Jørstad<sup>2</sup>, Maria Møll<sup>2</sup>, Mari Lundström<sup>1\*</sup>

<sup>1</sup> Department of Chemical and Metallurgical Engineering (CMET), Aalto University School of Chemical Engineering, P.O. Box 16200, FI-00076 AALTO, Finland

<sup>2</sup> Boliden Odda Zinc Smelter, Eitrheim, NO-5750 Odda, Norway

\* Correspondence: mari.lundstrom@aalto.fi

**Table S1.** Raw data obtained from the conductivity measurements of the synthetic zinc electrolytes.

| Test | Composition g/dm <sup>3</sup> |                                |    |    | <i>T</i> | <i>κ</i> |
|------|-------------------------------|--------------------------------|----|----|----------|----------|
|      | Zn                            | H <sub>2</sub> SO <sub>4</sub> | Mn | Mg | °C       | mS/cm    |
| 1    | 50                            | 150                            | 0  | 0  | 29.7     | 415      |
| 2    | 50                            | 150                            | 0  | 2  | 29.2     | 401      |
| 3    | 50                            | 150                            | 0  | 4  | 29.1     | 383      |
| 4    | 50                            | 175                            | 4  | 0  | 36.4     | 485      |
| 5    | 50                            | 175                            | 4  | 2  | 36.4     | 471      |
| 6    | 50                            | 175                            | 4  | 4  | 36.1     | 454      |
| 7    | 50                            | 200                            | 8  | 0  | 40.9     | 546      |
| 8    | 50                            | 200                            | 8  | 2  | 40.3     | 525      |
| 9    | 50                            | 200                            | 8  | 4  | 39.2     | 501      |
| 10   | 60                            | 150                            | 8  | 0  | 35.9     | 401      |
| 11   | 60                            | 150                            | 8  | 2  | 34.9     | 379      |
| 12   | 60                            | 150                            | 8  | 4  | 34.6     | 365      |
| 13   | 60                            | 175                            | 0  | 0  | 39.8     | 490      |
| 14   | 60                            | 175                            | 0  | 2  | 39.1     | 471      |
| 15   | 60                            | 175                            | 0  | 4  | 39.0     | 454      |
| 16   | 60                            | 200                            | 4  | 0  | 29.3     | 457      |
| 17   | 60                            | 200                            | 4  | 2  | 28.9     | 440      |
| 18   | 60                            | 200                            | 4  | 4  | 30.1     | 430      |
| 19   | 70                            | 150                            | 4  | 0  | 39.9     | 408      |
| 20   | 70                            | 150                            | 4  | 2  | 40.2     | 394      |
| 21   | 70                            | 150                            | 4  | 4  | 39.7     | 374      |
| 22   | 70                            | 175                            | 8  | 0  | 29.7     | 386      |
| 23   | 70                            | 175                            | 8  | 2  | 29.8     | 372      |
| 24   | 70                            | 175                            | 8  | 4  | 29.6     | 358      |
| 25   | 70                            | 200                            | 0  | 0  | 34.8     | 478      |
| 26   | 70                            | 200                            | 0  | 2  | 34.8     | 463      |
| 27   | 70                            | 200                            | 0  | 4  | 34.2     | 441      |
| 28   | 60                            | 175                            | 4  | 2  | 34.4     | 431      |
| 29   | 60                            | 175                            | 4  | 2  | 34.9     | 434      |
| 30   | 60                            | 175                            | 4  | 2  | 34.8     | 439      |
| 31   | 60                            | 175                            | 0  | 0  | 34.5     | 462      |
| 32   | 60                            | 175                            | 4  | 0  | 34.0     | 447      |
| 33   | 60                            | 175                            | 8  | 0  | 34.5     | 436      |
| 34   | 60                            | 175                            | 0  | 2  | 34.3     | 445      |
| 35   | 60                            | 175                            | 4  | 2  | 34.5     | 434      |
| 36   | 60                            | 175                            | 8  | 2  | 34.5     | 421      |
| 37   | 60                            | 175                            | 0  | 4  | 34.0     | 429      |

|    |    |     |   |   |      |     |
|----|----|-----|---|---|------|-----|
| 38 | 60 | 175 | 4 | 4 | 34.1 | 414 |
| 39 | 60 | 175 | 8 | 4 | 34.0 | 408 |
| 40 | 50 | 200 | 8 | 0 | 35.0 | 510 |
| 41 | 50 | 200 | 8 | 2 | 34.9 | 493 |
| 42 | 50 | 200 | 8 | 4 | 34.7 | 473 |
| 43 | 50 | 200 | 4 | 4 | 35.1 | 486 |
| 44 | 50 | 200 | 4 | 4 | 40.0 | 520 |
| 45 | 50 | 200 | 0 | 2 | 35.1 | 518 |
| 46 | 50 | 200 | 4 | 2 | 40.0 | 536 |
| 47 | 70 | 200 | 4 | 2 | 40.2 | 475 |
| 48 | 70 | 200 | 8 | 4 | 30.0 | 393 |
| 49 | 60 | 175 | 0 | 0 | 34.8 | 462 |

**Table S2.** Conductivity measurements of industrial electrolytes from the electrowinning cells at different temperatures.

| Sample ID | Temperature (°C) and conductivity (mS/cm) |          |      |          |      |          |      |          |      |          |
|-----------|-------------------------------------------|----------|------|----------|------|----------|------|----------|------|----------|
|           | T                                         | $\kappa$ | T    | $\kappa$ | T    | $\kappa$ | T    | $\kappa$ | T    | $\kappa$ |
| 1         | 38.2                                      | 414      | 29.9 | 374      | 34.9 | 399      | 40.0 | 420      | 44.9 | 445      |
| 2         | 39.6                                      | 424      | 29.8 | 379      | 34.9 | 403      | 39.8 | 428      | 44.9 | 449      |
| 3         | 39.6                                      | 428      | 30.2 | 382      | 34.9 | 404      | 40.1 | 428      | 44.8 | 449      |
| 4         | 40.2                                      | 432      | 29.8 | 382      | 35.0 | 408      | 39.8 | 430      | 44.9 | 451      |
| 5         | 36.8                                      | 402      | 30.2 | 370      | 34.8 | 393      | 39.7 | 416      | 44.8 | 437      |
| 6         | 39.9                                      | 431      | 29.8 | 381      | 34.7 | 407      | 39.8 | 431      | 44.9 | 458      |
| 7         | 40.7                                      | 436      | 30.1 | 383      | 34.9 | 408      | 39.7 | 431      | 44.9 | 454      |
| 8         | 40.5                                      | 437      | 30.0 | 385      | 34.8 | 409      | 40.0 | 433      | 44.8 | 455      |
| 9         | 36.1                                      | 395      | 29.9 | 366      | 34.8 | 389      | 39.8 | 412      | 44.9 | 435      |
| 10        | 40.0                                      | 432      | 30.0 | 384      | 34.8 | 408      | 39.8 | 430      | 44.8 | 453      |
| 11        | 39.9                                      | 434      | 29.8 | 382      | 34.9 | 407      | 40.0 | 433      | 44.8 | 455      |
| 12        | 39.9                                      | 434      | 30.0 | 385      | 34.8 | 408      | 39.8 | 433      | 44.8 | 454      |
| 13        | 35.5                                      | 391      | 29.9 | 367      | 34.8 | 392      | 40.0 | 416      | 45.1 | 435      |
| 14        | 39.7                                      | 433      | 29.9 | 387      | 34.9 | 413      | 39.8 | 435      | 44.8 | 458      |
| 15        | 40.0                                      | 435      | 29.9 | 388      | 35.0 | 413      | 39.9 | 437      | 44.8 | 458      |
| 16        | 41.2                                      | 443      | 30.0 | 390      | 34.8 | 416      | 39.0 | 441      | 44.8 | 461      |
